# Supplementary material for: Dampened neural activity and abolition of epileptic-like activity in cortical slices by active ingredients of spices
Source: PubMed Central journal article supplement — Sci Rep. 2014 Oct 31;4:6825. doi: 10.1038/srep06825 (PMC4215320; doi:10.1038/srep06825), 2014-10-31
Supplement: srep06825-s1.pdf [file srep06825-s1.pdf]

## Dampened neural activity and abolished epileptic-like activity in cortical slices by active ingredients of spices.

Maurizio Pezzoli<sup>1</sup>, Abdeladim Elhamdani<sup>1, 2</sup>, Susana Camacho<sup>1, 3</sup>, Julie Meystre<sup>1</sup>, Stephanie Michlig González<sup>3</sup>, Johannes le Coutre<sup>3, 4</sup>, Henry Markram<sup>1</sup>

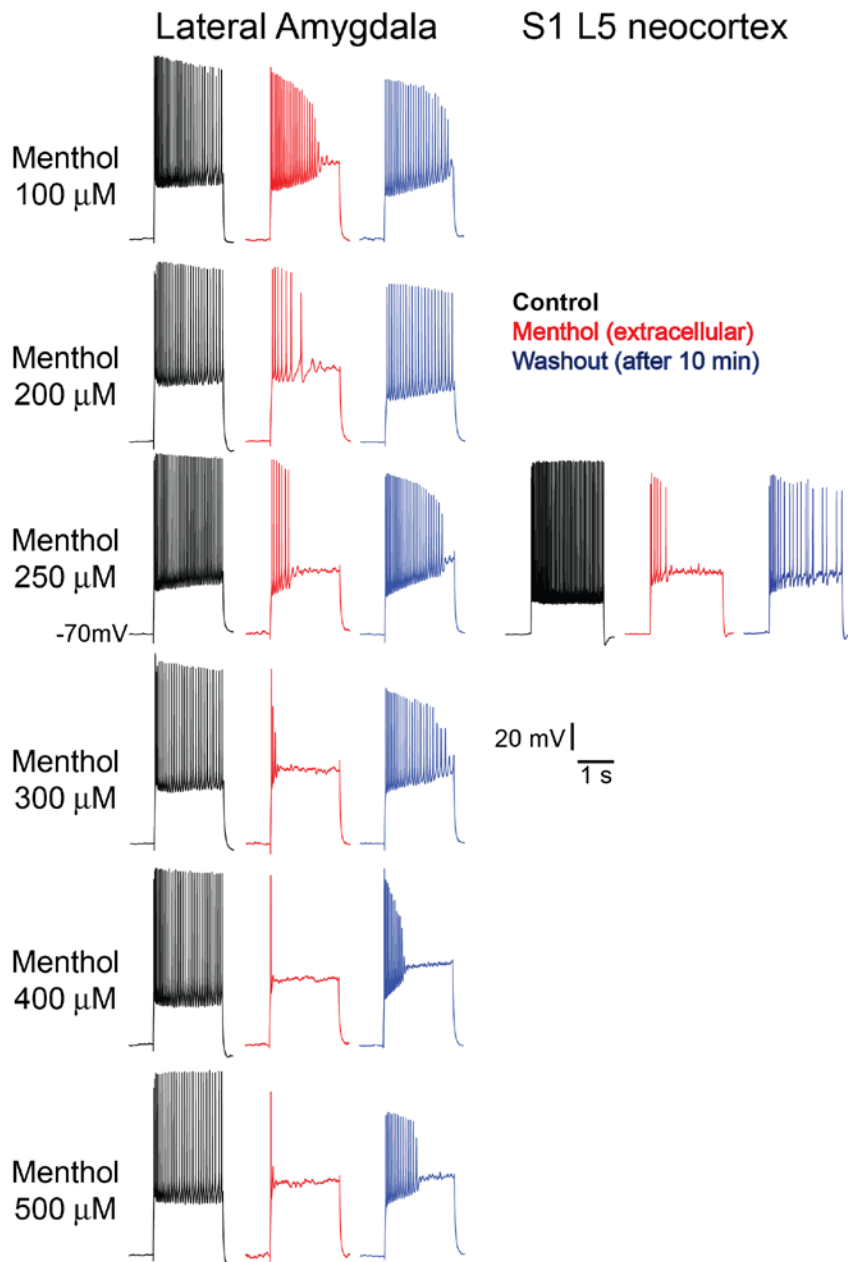

**Figure 1 sup:** Recorded traces from square pulse stimuli for different single pyramidal neurons (glutamatergic) on lateral amygdala (LA) eliciting APs (minimum  $n = 4$ , per concentration); presented for control (black), superfused menthol (red, concentrations in 100, 200, 250, 300, 400 and 500  $\mu\text{M}$ ) and washout (blue), compared to S1 L5 pyramidal neurons (in 250  $\mu\text{M}$  condition).
